# Supplementary material for: Spontaneous liquid marble formation on packed porous beds
Source: Royal Society of Chemistry journal article supplement (doi:10.1039/c2sm26529j), 2012-01-01
Supplement: c2sm26529j.pdf [file c2sm26529j.pdf]

# SPONTANEOUS LIQUID MARBLE FORMATION ON PACKED POROUS BEDS

## SUPPORTING INFORMATION

Catherine P. Whitby\*, Xun Bian, and Rossen Sedev

*Ian Wark Research Institute, University of South Australia,*

*Mawson Lakes, SA 5095, Australia*

|                                                                           |    |
|---------------------------------------------------------------------------|----|
| Particle contact angles derived from times for drop penetration into beds | S2 |
| Wetting behaviour of model hydrophobic flat surface                       | S3 |

Particle contact angles derived from times for drop penetration into beds

The contact angle of the ethanol-water solutions on the particles were derived from measurements of the time taken for the drops to penetrate into the powder bed, using Eq. (2).

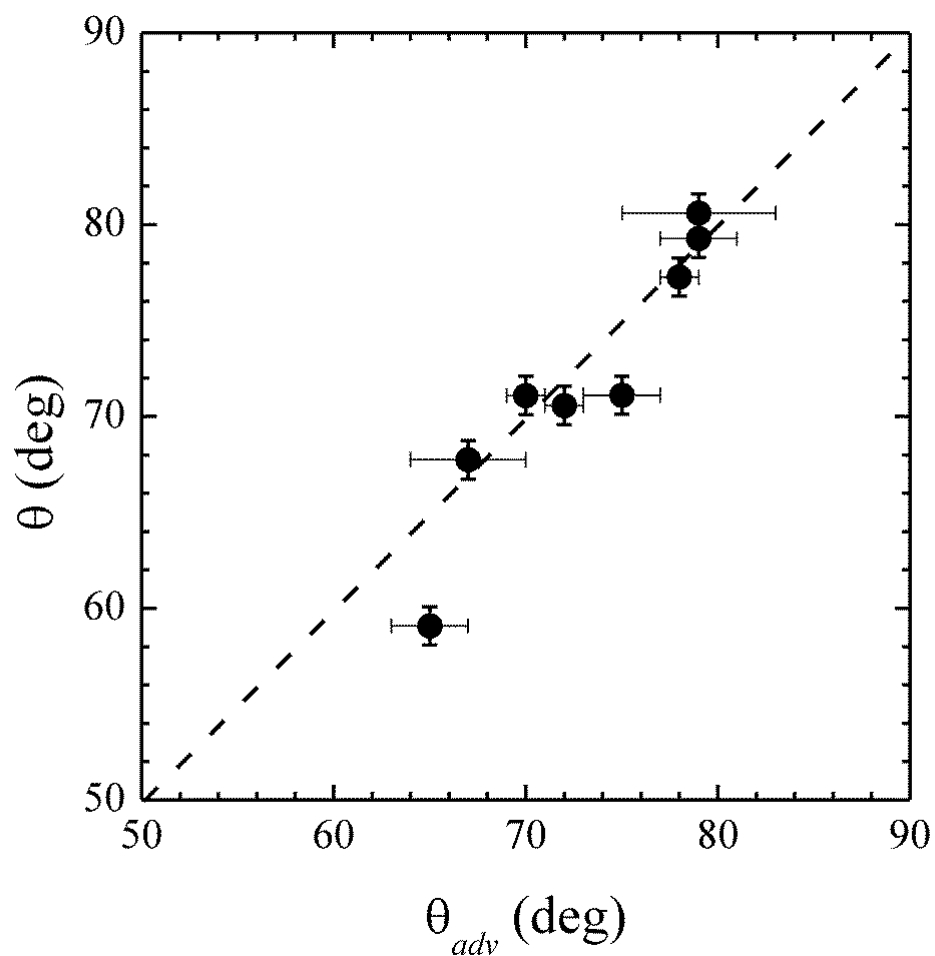

**Figure S1.** Comparison between the contact angle,  $\theta$ , derived from the penetration time,  $\tau$ , of ethanol-water drops in packed particle beds and the advancing contact angle,  $\theta_{adv}$ , measured on flat glass slides silanised in the same fashion as the glass beads. The dashed line with a slope of unity indicates equivalence.

### Wetting behaviour of hydrophobic flat surface

A model for the surface of the treated quartz beads used in our experiments is the surface of a glass slide silanised in the same fashion as the beads. Figure S2 summarises the wetting behaviour of various liquids on the fluorinated slide.

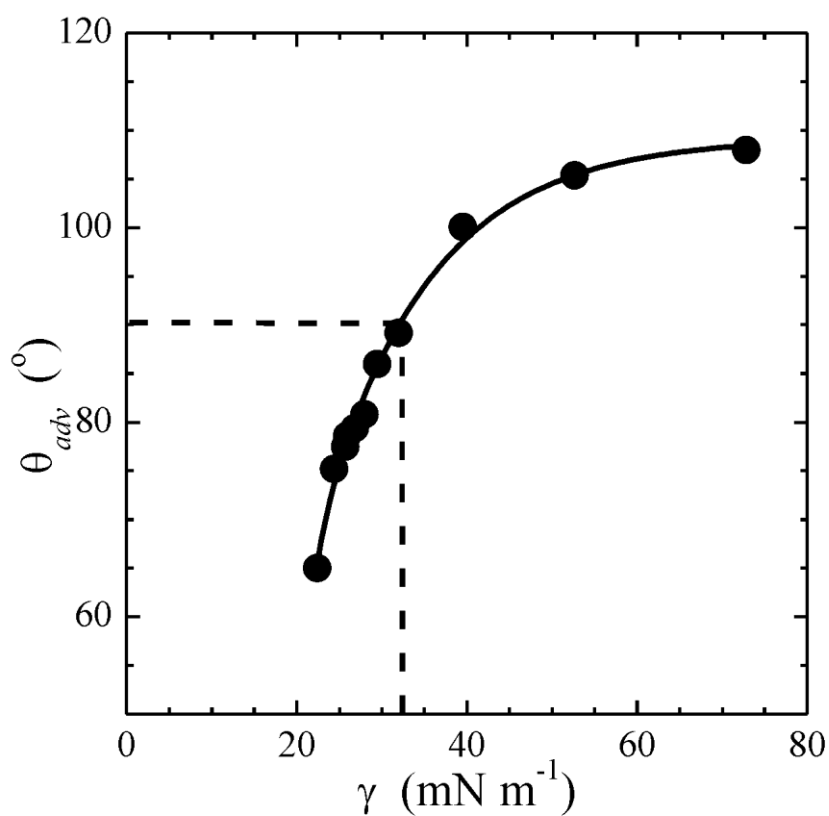

**Figure S2.** Surface tension dependence of the contact angles on a hydrophobic glass slide.

The dashed lines indicate the surface tension corresponding to contact angles of 90°.
